# Supplementary material for: IV Certamen de cortometraje juvenil, Huarte 2008
Source: MDPI journal article supplement (doi:10.3390/nano13061006), 2008-01-01
Supplement: s1 [file s1]

## Figure

**Figure S1.** UV-visible spectra for Ludox with different concentrations of the solid phase: (a) SM with  $d_{av} = 7$  nm, (b) HS with  $d_{av} = 12$  nm, (c) TM with  $d_{av} = 22$  nm;

**Figure S2.** Thermal diffusivity of various Ludox with different concentrations of the solid phase measured by the TLS (Equations 10 and 2; lines,) and heat-flow method (Equations 14; crosses): (a) SM with  $d_{av} = 7$  nm, (b) HS with  $d_{av} = 12$  nm, (c) TM with  $d_{av} = 22$  nm.

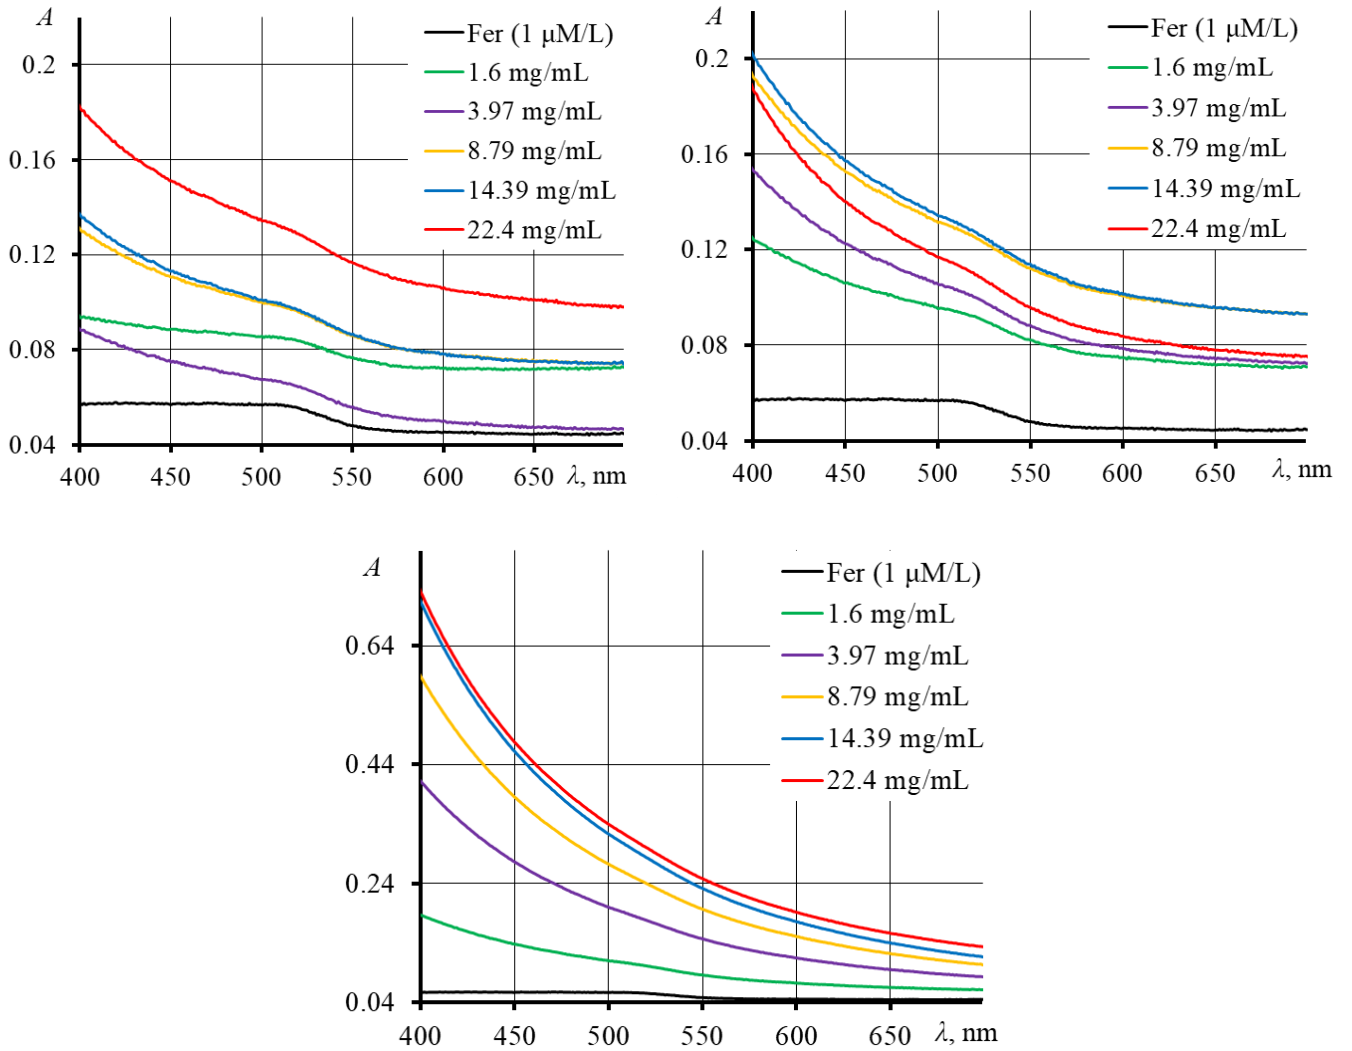

**Figure S1.** UV-visible spectra for Ludox with different concentrations of the solid phase: (a) SM with  $d_{av} = 7$  nm, (b) HS with  $d_{av} = 12$  nm, (c) TM with  $d_{av} = 22$  nm;

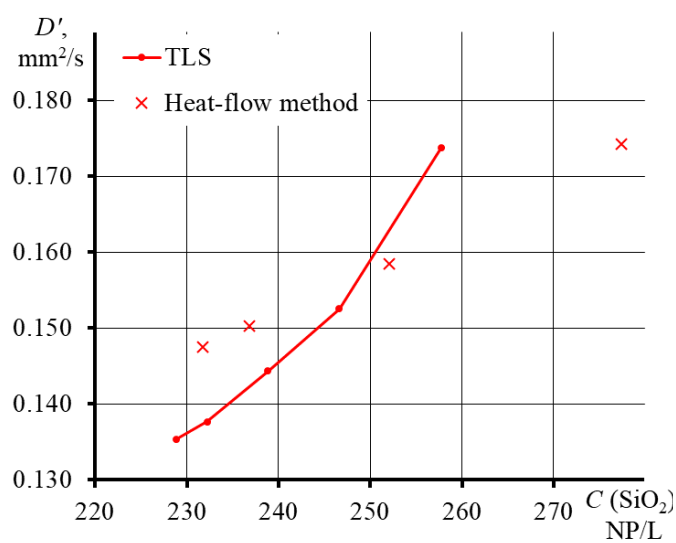

(a)

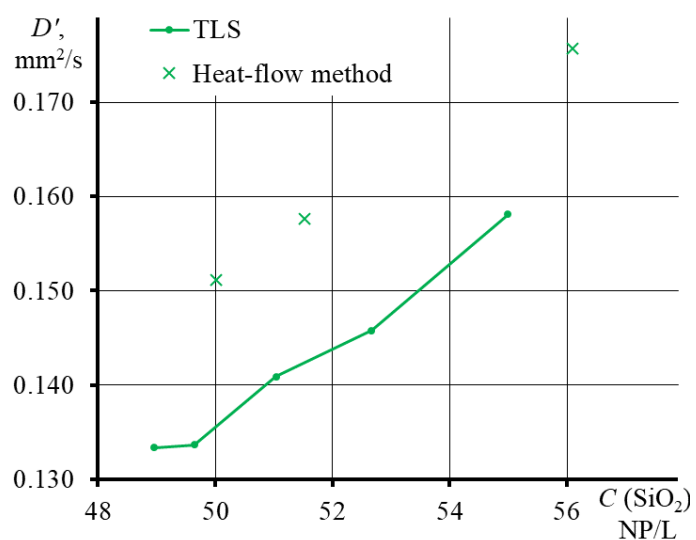

(b)

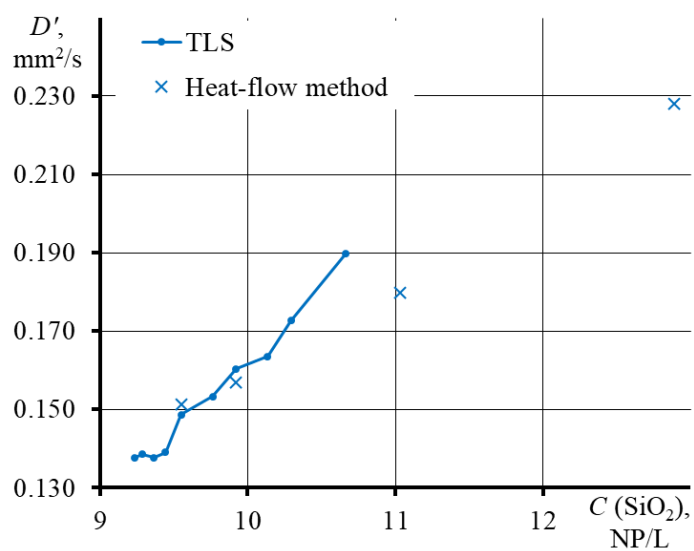

(c)

**Figure S2.** Thermal diffusivity of various Ludox with different concentrations of the solid phase measured by the TLS (Equations 10 and 2; lines,) and heat-flow method (Equations 14; crosses): (a) SM with  $d_{av} = 7$  nm, (b) HS with  $d_{av} = 12$  nm, (c) TM with  $d_{av} = 22$  nm.
